# Supplementary material
Source: Springer Nature journal article supplement (https://www.springermedizin.de/resource/supplementary/13048_2010_47_MOESM7_ESM.pdf/9664780)

**(a)**

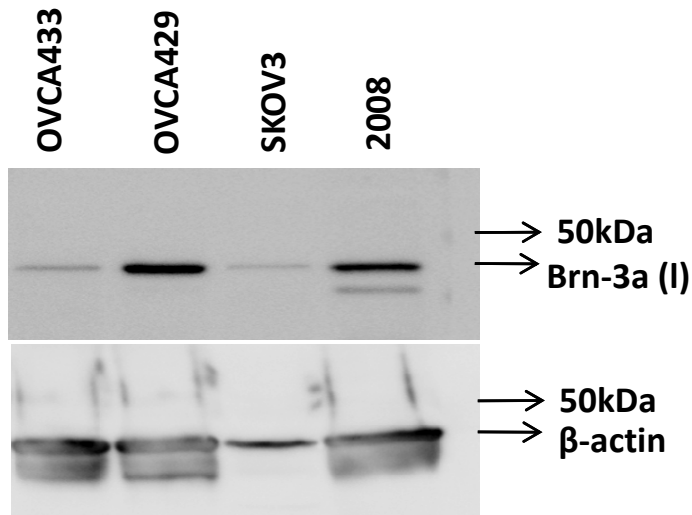

**(b)**

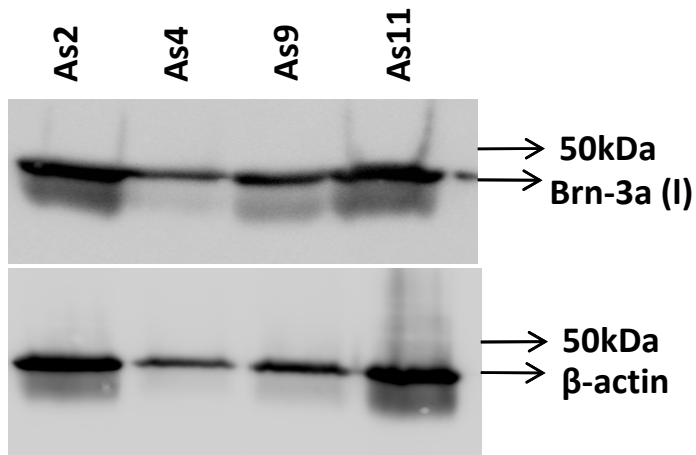

Supplement: MOESM7 [file 9664780]
